# Supplementary material for: CCN family member 2/connective tissue growth factor (CCN2/CTGF) is regulated by Wnt–β-catenin signaling in nucleus pulposus cells
Source: PubMed Central journal article supplement (PMC6162946; doi:10.1186/s13075-018-1723-8), 2018-09-29

Fig. S2

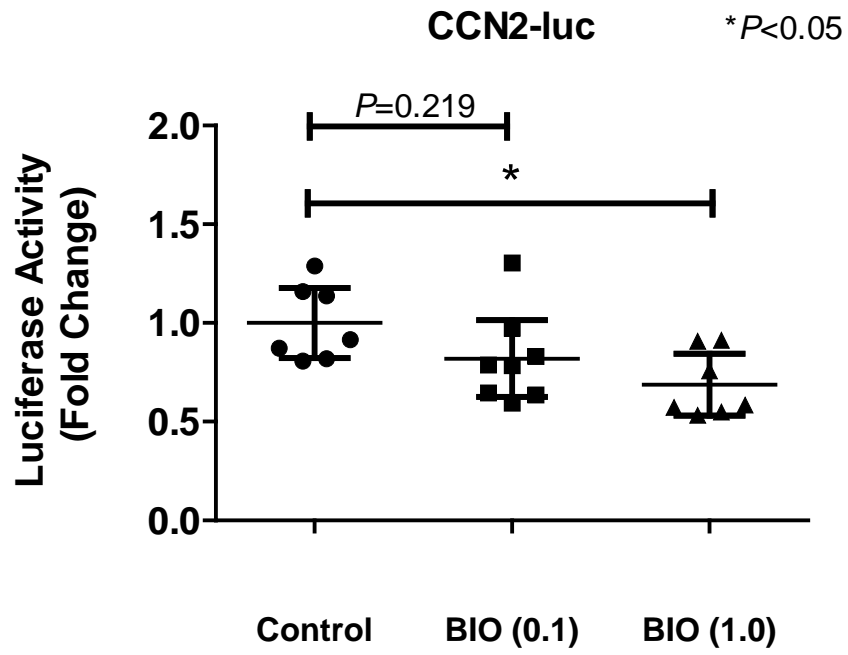

Supplement: 13075_2018_1723_MOESM2_ESM.pdf [file 13075_2018_1723_MOESM2_ESM.pdf]
