# Supplementary material for: CCN family member 2/connective tissue growth factor (CCN2/CTGF) is regulated by Wnt–β-catenin signaling in nucleus pulposus cells
Source: Springer Nature journal article supplement (doi:10.1186/s13075-018-1723-8), 2018-09-29

**Fig. S3**

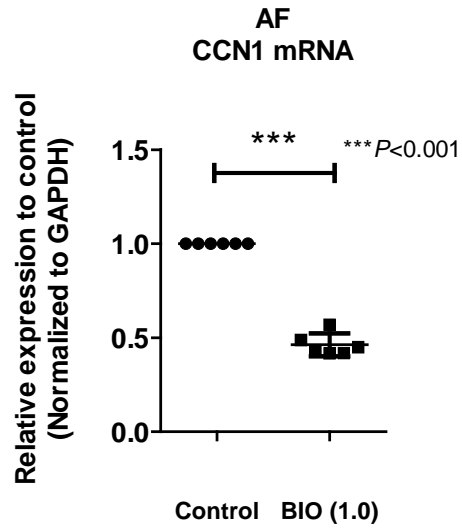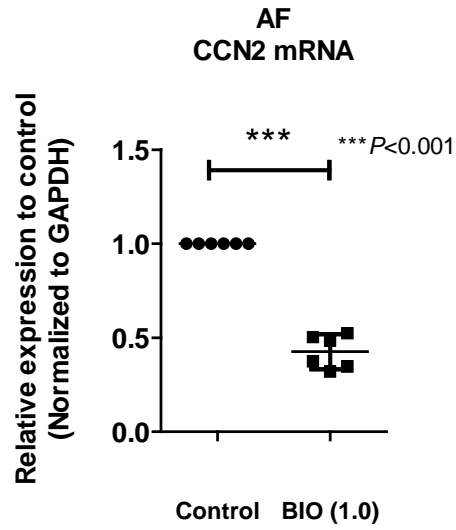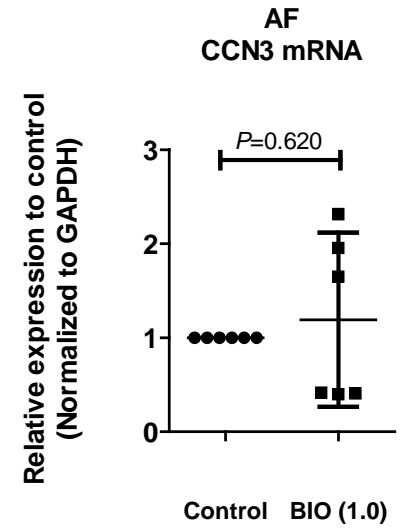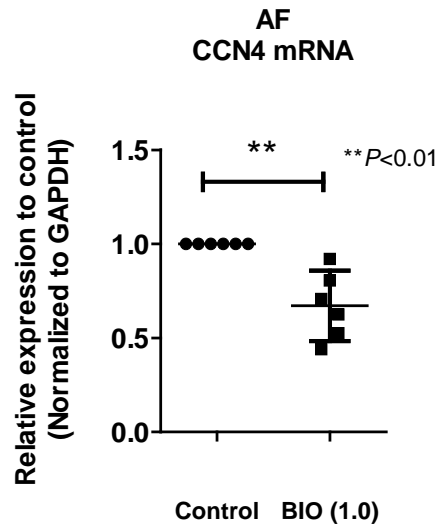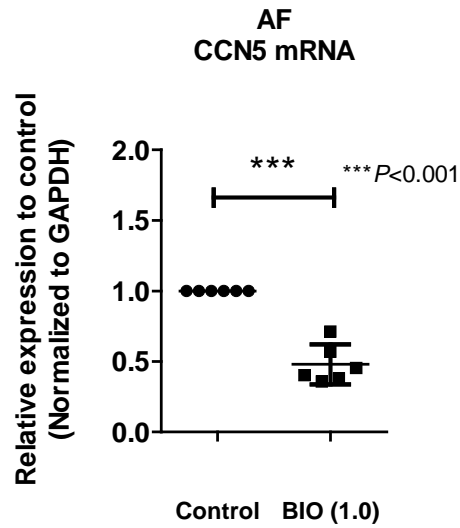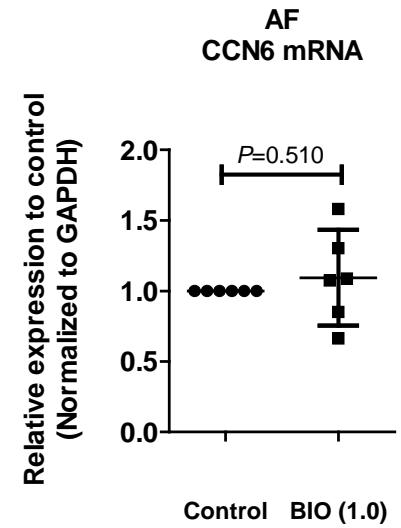

Supplement: MOESM3 [file 16162402]
